# Supplementary material for: m6A methyltransferase METTL3-mediated lncRNA FOXD2-AS1 promotes the tumorigenesis of cervical cancer
Source: PubMed Central journal article supplement — Mol Ther Oncolytics. 2021 Jul 21;22:574–81. doi: 10.1016/j.omto.2021.07.004 (PMC8450180; doi:10.1016/j.omto.2021.07.004), 2021-07-21
Supplement: mmc1.pdf [file mmc1.pdf]

OMTO, Volume 22

**Supplemental information**

**m<sup>6</sup>A methyltransferase**

**METTL3-mediated lncRNA FOXD2-AS1**

**promotes the tumorigenesis of cervical cancer**

**Fei Ji, Yang Lu, Shaoyun Chen, Xiaoling Lin, Yan Yu, Yuanfang Zhu, and Xin Luo**

**Supplement Table S1.** Sequences of shRNA and qRT-PCR primers.

---

|                | 5'-3'                                                                          |
|----------------|--------------------------------------------------------------------------------|
| METTL3         | forward, 5'-TTGTCTCCAACCTTCCGTAGT-3'<br>reverse, 5'-CCAGATCAGAGAGGGTGGTGTAG-3' |
| FOXD2-AS1      | forward, 5'-TGGACCTAGCTGCAGCTCCA-3'<br>reverse, 5'-AGTTGAAGGTGCACACACTG-3'     |
| p21            | forward, 5'-TGTCCGTCAGAACCCATGC-3'<br>reverse, 5'-AAAGTCGAAGTTCCATCGCTC-3'     |
| sh-FOXD2-AS1-1 | 5'-ATTCCGAGCTAATTCAAGATTT-3'                                                   |
| sh-FOXD2-AS1-2 | 5'-TTAAGCGCTACCGGGATTT-3'                                                      |
| sh-FOXD2-AS1-3 | 5'-ACCTGGTTCCAAGCACGCTTTTT-3'                                                  |
| GAPDH          | forward, 5'-GTCTCCTCTGACTTCAACAGCG-3'<br>reverse, 5'-ACCACCCTGTTGCTGTAGCCAA-3' |

---
